# Supplementary material
Source: publisher site journal article supplement (https://www.dovepress.com/get_supplementary_file.php?f=320545.docx)
Supplement: Supplementary file 1 [file get_supplementary_file.php]

**Supplementary materials**

**Supplementary Table S1**. Numbers (range) of the improper practice of laboratory tests per month detected by LS.

| Practice/Test per month | **1-3** | **4-6** | **>6** | **Total** | **Percent(%)** |
| --- | --- | --- | --- | --- | --- |
| **Overused** | 2 | 1 | 4 | 7 | 50.00 |
| **Misused** | 1 | 1 | 3 | 5 | 35.71 |
| **Underused** | 1 | 1 | 0 | 2 | 14.29 |
| **Total** | | | **14** | | |

**Supplementary Table S2.** Types and examples of lab tests being used improperly. (Zhi et al., 2013)

| **Overused** | **Misused** | **Underused** |
| --- | --- | --- |
| Hepatitis B, C, and Delta | Chromosomal Microarray | Flu |
| Chromosomal Microarray | Hepatitis B and C, &HCV Genotype | Dengue |
| Hepatitis B eAg and Hepatitis Delta | Beta thalassemia and alpha thalassemia genotype | Molecular test appropriate to the clinical condition |
| Respiratory test | HIV PCR |  |
| Most of the immunology tests | FISH |  |
| Vitamin D | Too many to mention |  |
| EBV |  |  |
| VZV |  |  |
| HIV PCR |  |  |
| Panels of tests |  |  |
| Troponin |  |  |
| HbA1C |  |  |

**Supplementary data**

**Supplementary Table S3**

| **Suppl data 1. Demographic data of lab supervisors.** | | |
| --- | --- | --- |
| **Variable** | **Laboratory supervisors- *N, (%)*** |
| **Age group**  30-39 years  40-49 years  >50 years | 6 (40.0)  8 (53.3)  1(6.7) |
| **Qualification***  BSc  MSc  PhD | 7(50.0)  5(35.7)  2(14.3) |
| **Experience time as a laboratory supervisor**  <3 y  3-10 y  ≥10 years | 1(6.7)  9(60.0)  5(33.3) |
| **Lab Supervisor’s Specialty**  Blood Bank  Hematology and Chemistry  Hematology  Immunology  Microbiology  Virology  Cytogenetics  Cytology  Histocompatibility  Genetics  Lab Management | 1(7.1)  1(7.1)  1(7.1)  1(7.1)  1(7.1)  3 (21.4)  1(7.1)  1(7.1)  2(14.3)  1(7.1)  1(7.1) |

1. **Lab Supervisors**

Data represent the numbers and percentage of each between brackets.

*All LS (n=15) had a BSc degree, but five of them got a master’s degree, and two got a Ph.D. degree.

**Supplementary Table S4**

| ***Supp data 2. Demographic data of the physicians-*** | |
| --- | --- |
| **Variable** | **Physicians *N, (%)*** |
| **Age group**  25-29 years  30-39 years  40-49 years  >50 years | 8 (9.1)  27 (30.7)  34 (38.6)  20 (21.6) |
| **Practice as**  **Numbers of GP**  **Experience time as GP practice**  <3 y  3-10 y  >10 y  None  **Numbers of Specialist**    **Experience time as a specialist**  <3 y  3-10 y  >10 y | 10 (11.4)  18 (19.3%)  24 (27.3)  36 (40.9)  11(12.5)  79 (88. 6)  4 (4.5)  32 (35.2)  43 (48.9) |

Data represent the numbers and percentage of each between brackets.

**Supplementary data 3.**

**Supplementary Figure S1:** Surveys - samples of questionnaires

Reference

Zhi, M., Ding, E. L., Theisen-Toupal, J., Whelan, J., & Arnaout, R. (2013). The landscape of inappropriate laboratory testing: a 15-year meta-analysis. *PLoS One*, *8*(11), e78962-e78962. https://doi.org/10.1371/journal.pone.0078962
